# Supplementary material for: Clinical Safety of Expanded Hemodialysis Compared with Hemodialysis Using High-Flux Dialyzer during a Three-Year Cohort
Source: MDPI journal article supplement (doi:10.3390/jcm11082261), 2022-04-18
Supplement: s1 [file s1]

**Supplementary Table S1. The differences of laboratory parameter values according to the membrane types and time**

|                         | Membrane<br>(MCO versus HF) |       |                 | Time<br>(per month)  |       |                 | Interaction between<br>membrane and time |       |                 |
|-------------------------|-----------------------------|-------|-----------------|----------------------|-------|-----------------|------------------------------------------|-------|-----------------|
|                         | Estimate ( $\beta$ )        | SE    | <i>P</i> -value | Estimate ( $\beta$ ) | SE    | <i>P</i> -value | Estimate ( $\beta$ )                     | SE    | <i>P</i> -value |
| Hemoglobin              | 0.092                       | 0.178 | 0.608           | 0.004                | 0.005 | 0.418           | -0.007                                   | 0.006 | 0.223           |
| Ferritin <sup>a</sup>   | 0.294                       | 0.163 | 0.076           | -0.005               | 0.004 | 0.163           | -0.009                                   | 0.005 | 0.066           |
| Albumin                 | -0.180                      | 0.053 | 0.001           | -0.001               | 0.001 | 0.682           | -0.0003                                  | 0.002 | 0.855           |
| Calcium                 | -0.002                      | 0.144 | 0.988           | -0.012               | 0.003 | <0.001          | -0.004                                   | 0.004 | 0.320           |
| Phosphorus              | -0.177                      | 0.259 | 0.495           | 0.007                | 0.006 | 0.261           | 0.010                                    | 0.008 | 0.188           |
| Intact PTH <sup>a</sup> | 0.183                       | 0.181 | 0.316           | 0.012                | 0.003 | 0.001           | -0.001                                   | 0.004 | 0.778           |

*P*-values of linear mixed models were approximated by Satterthwaite's method. <sup>a</sup>Ferritin and intact

PTH values were log-transformed. MCO, medium cut-off membrane; HF, high-flux membrane; SE, standard error; PTH, parathyroid hormone.

**Supplementary Table S2. The differences of drug prescriptions according to the membrane types and time**

|                               | Membrane<br>(MCO versus HF) |       |                 | Time<br>(per month)  |       |                 | Interaction between<br>membrane and time |       |                 |
|-------------------------------|-----------------------------|-------|-----------------|----------------------|-------|-----------------|------------------------------------------|-------|-----------------|
|                               | Estimate ( $\beta$ )        | SE    | <i>P</i> -value | Estimate ( $\beta$ ) | SE    | <i>P</i> -value | Estimate ( $\beta$ )                     | SE    | <i>P</i> -value |
| Darbepoetin <sup>a</sup>      | -0.102                      | 0.122 | 0.408           | -0.003               | 0.009 | 0.726           | 0.013                                    | 0.011 | 0.258           |
| Phosphate binder <sup>b</sup> | -0.312                      | 0.610 | 0.611           | -0.051               | 0.063 | 0.423           | 0.123                                    | 0.077 | 0.115           |
| Cinacalcet <sup>b</sup>       | 0.260                       | 0.487 | 0.597           | 0.074                | 0.067 | 0.278           | -0.010                                   | 0.078 | 0.895           |
| Paricalcitol <sup>b</sup>     | 0.021                       | 0.408 | 0.959           | 0.022                | 0.038 | 0.573           | -0.012                                   | 0.046 | 0.799           |

*P*-values of linear mixed models were approximated by the Satterthwaite's method. <sup>a</sup>Darbepoetin doses were log-transformed. <sup>b</sup>The quantities of phosphate binder, cinacalcet, and paricalcitol were square root transformed. Phosphate binder included calcium carbonate, calcium acetate, and sevelamer. HF, high-flux membrane; MCO, medium cut-off membrane; SE, standard error.

**Supplementary Table S3. The differences of inflammatory cytokines levels according to the membrane types and time**

|                   | Membrane<br>(MCO versus HF) |       |                 | Time<br>(per a year) |       |                 | Interaction between<br>membrane and time |       |                 |
|-------------------|-----------------------------|-------|-----------------|----------------------|-------|-----------------|------------------------------------------|-------|-----------------|
|                   | Estimate<br>( $\beta$ )     | SE    | <i>P</i> -value | Estimate ( $\beta$ ) | SE    | <i>P</i> -value | Estimate ( $\beta$ )                     | SE    | <i>P</i> -value |
| IFN- $\gamma^a$   | -0.019                      | 0.215 | 0.929           | -0.262               | 0.066 | <0.001          | 0.040                                    | 0.082 | 0.626           |
| IL-1 $\beta^a$    | -0.064                      | 0.179 | 0.719           | -0.369               | 0.098 | 0.001           | 0.107                                    | 0.123 | 0.392           |
| IL-6 <sup>a</sup> | 0.154                       | 0.215 | 0.477           | -0.011               | 0.068 | 0.877           | -0.039                                   | 0.085 | 0.646           |
| TNF- $\alpha$     | -1.046                      | 0.746 | 0.163           | -0.097               | 0.560 | 0.864           | 0.213                                    | 0.699 | 0.763           |

*P*-values of linear mixed models were approximated by Satterthwaite's method. <sup>a</sup>The levels of IFN- $\gamma$ , IL-1 $\beta$ , and IL-6 were log-transformed. MCO, medium cut-off membrane; HF, high-flux membrane; SE, standard error; IFN, interferon; IL, interleukin; TNF, tumor necrosis factor.

**Supplementary Table S4. The annual concentration values of inflammatory cytokines**

|                   | Baseline                 | Year 1                   |                 | Year 2                   |                 | Year 3                   |                 |
|-------------------|--------------------------|--------------------------|-----------------|--------------------------|-----------------|--------------------------|-----------------|
|                   | Mean $\pm$ SD<br>(pg/mL) | Mean $\pm$ SD<br>(pg/mL) | <i>P</i> -value | Mean $\pm$ SD<br>(pg/mL) | <i>P</i> -value | Mean $\pm$ SD<br>(pg/mL) | <i>P</i> -value |
| IFN- $\gamma^a$   | 1.27 $\pm$ 0.60          | 1.16 $\pm$ 0.85          | 1.000           | 1.15 $\pm$ 0.80          | 1.000           | 0.48 $\pm$ 0.49          | <0.001          |
| IL-1 $\beta^a$    | -0.24 $\pm$ 0.51         | -0.43 $\pm$ 0.62         | 0.782           | -0.85 $\pm$ 0.56         | <0.001          | -1.12 $\pm$ 1.03         | <0.001          |
| IL-6 <sup>a</sup> | 1.74 $\pm$ 0.84          | 1.62 $\pm$ 0.66          | 1.000           | 1.62 $\pm$ 0.55          | 1.000           | 1.62 $\pm$ 0.69          | 1.000           |
| TNF- $\alpha$     | 24.42 $\pm$ 2.08         | 25.28 $\pm$ 2.59         | 1.000           | 25.18 $\pm$ 2.45         | 1.000           | 24.59 $\pm$ 7.77         | 1.000           |

*P*-values were calculated by pairwise paired t-test with Bonferroni correction, which analyzes the difference from the baseline value. <sup>a</sup>The levels of IFN- $\gamma$ , IL-1 $\beta$ , and IL-6 were log-transformed. SD, standard deviation; IFN, interferon; IL, interleukin; TNF, tumor necrosis factor.
